# Supplementary material for: Engineering Additive Manufacturing and Molding Techniques to Create Lifelike Willis’ Circle Simulators with Aneurysms for Training Neurosurgeons
Source: MDPI journal article supplement (doi:10.3390/polym12122901), 2020-12-03
Supplement: s1 [file s1]

## **(Supplementary Materials)**

### **Engineering Additive Manufacturing and Molding Techniques to Create Lifelike Willis' Circle Simulators with Aneurysms for Training Neurosurgeons**

Pin-Chuan Chen<sup>1,2</sup>, Jang-Chun Lin<sup>3,4</sup>, Chung-Hsuan Chiang<sup>1</sup>, Yi-Chin Chen<sup>1</sup>, Jia-En Chen<sup>5,6</sup>, Wei-Hsiu Liu<sup>7,8\*</sup>

<sup>1</sup>Department of Mechanical Engineering, National Taiwan University of Science and Technology, Taipei, Taiwan

<sup>2</sup>High Speed 3D Printing Research Center, National Taiwan University of Science and Technology, Taipei, Taiwan

<sup>3</sup>Department of Radiation Oncology, Shuang Ho Hospital, Taipei Medical University, Taipei, Taiwan, ROC

<sup>4</sup>Department of Radiology, School of Medicine, College of Medicine, Taipei Medical University, Taipei, Taiwan,

<sup>5</sup>Medical 3D Printing Center, Tri-Service General Hospital and National Defense Medical Center, Taipei, Taiwan

<sup>6</sup>Department of Biomedical Engineering, Tri-Service General Hospital and National Defense Medical Center, Taipei, Taiwan

<sup>7</sup>Department of Neurological Surgery, Tri-Service General Hospital and National Defense Medical Center, Taipei, Taiwan, ROC

<sup>8</sup>Department of Surgery, School of Medicine, National Defense Medical Center, Taipei, Taiwan, ROC

[\\*liubear0812bear@yahoo.com.tw](mailto:liubear0812bear@yahoo.com.tw), Tel: 886-2-87927177, Fax: 886-2-87927178

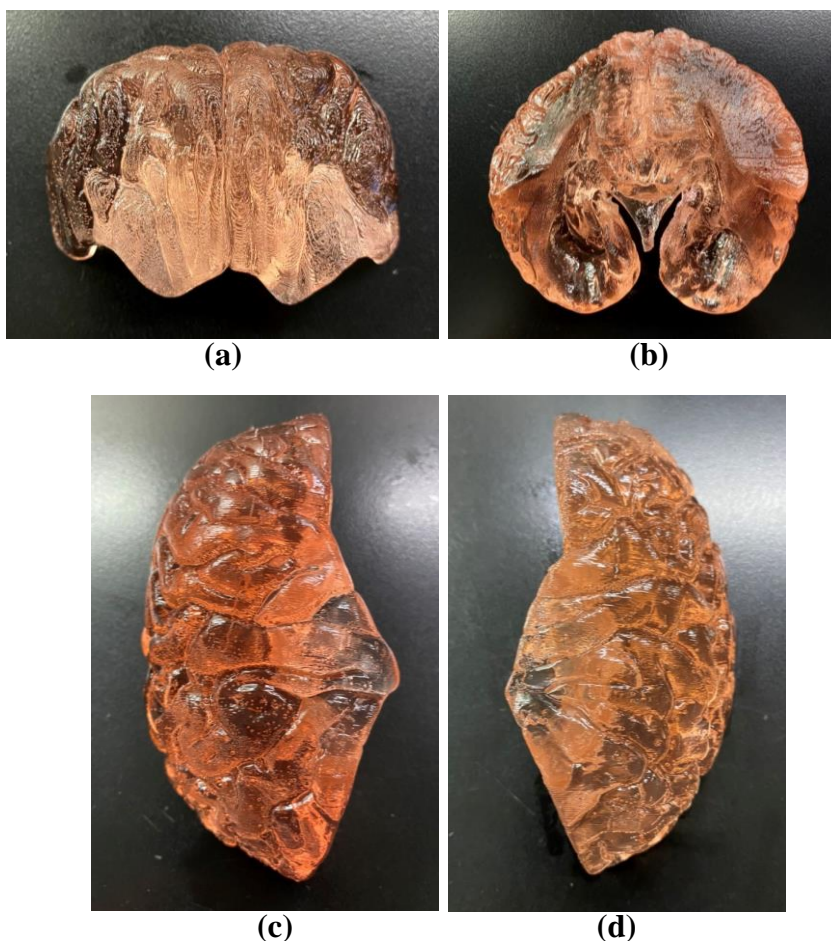

Figure S1: (a) parietal lobe; (b) occipital lobe; (c) frontal lobe; (d) frontal lobe

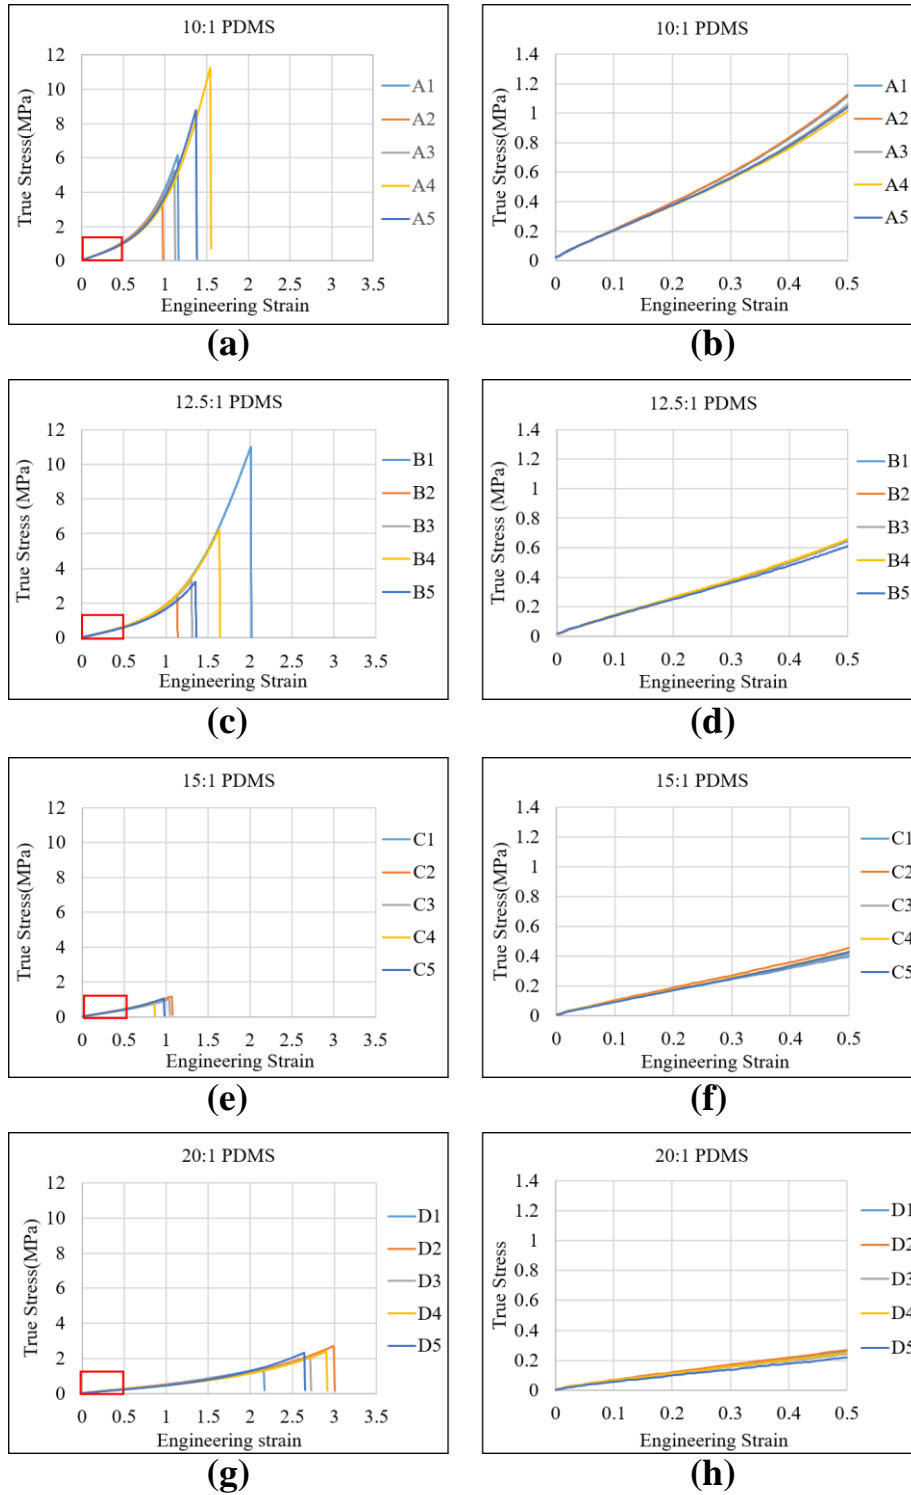

Figure S2: (a) 5 tensile test results with 10:1 PDMS mixture; (b) enlarged area in (a) marked in red rectangle; (c) 5 tensile test results with 12.5:1 PDMS mixture; (d) enlarged area in (a) marked in red rectangle; (e) 5 tensile test results with 15:1 PDMS mixture; (f) enlarged area in (a) marked in red rectangle; (g) 5 tensile test results with 20:1 PDMS mixture; (h) enlarged area in (a) marked in red rectangle.
